# Supplementary material
Source: ML conference proceedings conference paper supplement (https://proceedings.neurips.cc/paper_files/paper/2022/hash/646ca7b994bc46afe33d680dbe7ed67a-Abstract.html)
Supplement: Supplementary file 1 [file 646ca7b994bc46afe33d680dbe7ed67a-Supplemental-Conference.pdf]

## A Proof of Theorem 1

*Proof.* We mainly use Hoeffding's inequality to prove Theorem 1. Notice that the Integral Probability Metrics (IPM) is defined as  $d_{\mathcal{H}}(\mathcal{D}_i, \mathcal{D}_j) = \sup_{h \in \mathcal{H}} |\mathcal{L}_{\mathcal{D}_i}(h) - \mathcal{L}_{\mathcal{D}_j}(h)|$ . For  $\forall h \in \mathcal{H}$  and client  $C_i, \forall i \in \{1, \dots, N\}$ , we have

$$\begin{aligned}
\left| \mathcal{L}_{\mathcal{D}_i}(h) - \hat{\mathcal{L}}_{\alpha_i}(h) \right| &= \left| \mathcal{L}_{\mathcal{D}_i}(h) - \sum_{j=1}^N \alpha_{ij} \hat{\mathcal{L}}_{S_j}(h) \right| \\
&= \left| \sum_{j=1}^N \alpha_{ij} \mathcal{L}_{\mathcal{D}_i}(h) - \sum_{j=1}^N \alpha_{ij} \mathcal{L}_{\mathcal{D}_j}(h) + \sum_{j=1}^N \alpha_{ij} \mathcal{L}_{\mathcal{D}_j}(h) - \sum_{j=1}^N \alpha_{ij} \hat{\mathcal{L}}_{S_j}(h) \right| \\
&= \left| \sum_{j=1}^N \alpha_{ij} \mathcal{L}_{\mathcal{D}_i}(h) - \sum_{j=1}^N \alpha_{ij} \mathcal{L}_{\mathcal{D}_j}(h) \right| + \left| \sum_{j=1}^N \alpha_{ij} \mathcal{L}_{\mathcal{D}_j}(h) - \sum_{j=1}^N \alpha_{ij} \hat{\mathcal{L}}_{S_j}(h) \right| \\
&\leq \sum_{j=1}^N \alpha_{ij} |\mathcal{L}_{\mathcal{D}_i}(h) - \mathcal{L}_{\mathcal{D}_j}(h)| + \left| \sum_{j=1}^N \alpha_{ij} \mathcal{L}_{\mathcal{D}_j}(h) - \sum_{j=1}^N \alpha_{ij} \hat{\mathcal{L}}_{S_j}(h) \right| \\
&\leq \sum_{j=1}^N \alpha_{ij} d_{\mathcal{H}}(\mathcal{D}_i, \mathcal{D}_j) + \left| \sum_{j=1}^N \alpha_{ij} \mathcal{L}_{\mathcal{D}_j}(h) - \sum_{j=1}^N \alpha_{ij} \hat{\mathcal{L}}_{S_j}(h) \right|.
\end{aligned}$$

For the loss function  $l$ , let  $\{X_1, \dots, X_{m_1}\}$  be the random variables which take on values  $\frac{\alpha_{i1}M}{m_1} l(h(\mathbf{x}), y)$  for the  $m_1$  examples  $(\mathbf{x}, y) \in S_1$  with respect to  $h \in \mathcal{H}$ . Random variables  $\{X_{m_1+1}, \dots, X_M\}$  are defined analogously. Then the weighted empirical risk  $\sum_{j=1}^N \alpha_{ij} \hat{\mathcal{L}}_{S_j}(h)$  can be written as follows:

$$\sum_{j=1}^N \alpha_{ij} \hat{\mathcal{L}}_{S_j}(h) = \sum_{t=1}^N \frac{\alpha_{ij}}{m_t} \sum_{j=1}^{m_t} l(h(\mathbf{x}_j^t), y_j^t) = \frac{1}{M} \sum_{j=1}^M X_j.$$

By the linearity of expectations, we have

$$\mathbb{E} \left[ \sum_{j=1}^N \alpha_{ij} \hat{\mathcal{L}}_{S_j}(h) \right] = \sum_{j=1}^N \alpha_{ij} \mathcal{L}_{\mathcal{D}_j}(h).$$

Then the following result holds for every  $h \in \mathcal{H}$  according to Hoeffding's inequality:

$$\Pr \left[ \left| \sum_{j=1}^N \alpha_{ij} \hat{\mathcal{L}}_{S_j}(h) - \sum_{j=1}^N \alpha_{ij} \mathcal{L}_{\mathcal{D}_j}(h) \right| \geq \epsilon \right] \leq 2 \exp \left( -\frac{2M^2\epsilon^2}{\sum_{j=1}^M \text{Range}^2(X_j)} \right) = 2 \exp \left( -\frac{2\epsilon^2}{\mu^2 \sum_{j=1}^N \frac{\alpha_{ij}^2}{m_j}} \right).$$

By the definition of growth function  $\Pi_{\mathcal{H}}(\cdot)$  and according to union bound, the following result holds for  $\forall h \in \mathcal{H}$ :

$$\begin{aligned}
\Pr \left[ \left| \sum_{j=1}^N \alpha_{ij} \hat{\mathcal{L}}_{S_j}(h) - \sum_{j=1}^N \alpha_{ij} \mathcal{L}_{\mathcal{D}_j}(h) \right| \geq \epsilon \right] &\leq 4\Pi_{\mathcal{H}}(2M) \exp \left( \frac{-2(\frac{1}{4}\epsilon)^2}{\mu^2 \sum_{j=1}^N \frac{\alpha_{ij}^2}{m_j}} \right) \\
&\leq 4(2M)^d \exp \left( \frac{-\frac{1}{8}\epsilon^2}{\mu^2 \sum_{j=1}^N \frac{\alpha_{ij}^2}{m_j}} \right).
\end{aligned}$$

Substituting  $\delta$  for the probability gives the following result:

$$\epsilon = \mu \sqrt{\sum_{j=1}^N \frac{\alpha_{ij}^2}{m_j}} \sqrt{8(d \log(2M) + \log \frac{4}{\delta})}.$$

Note that  $h_i^* = \arg \min_{h \in \mathcal{H}} \mathcal{L}_{\mathcal{D}_i}(h)$  and  $\hat{h}_{\alpha_i} = \arg \min_{h \in \mathcal{H}} \hat{\mathcal{L}}_{\alpha_i}(h)$ . Given any  $\delta \in (0, 1)$ , the following result holds with probability at least  $1 - \delta$ :

$$\begin{aligned} \mathcal{L}_{\mathcal{D}_i}(\hat{h}_{\alpha_i}) &\leq \hat{\mathcal{L}}_{\alpha_i}(\hat{h}_{\alpha_i}) + \mu \sqrt{\sum_{j=1}^N \frac{\alpha_{ij}^2}{m_j}} \sqrt{8(d \log(2M) + \log \frac{8}{\delta})} + \sum_{j=1}^N \alpha_{ij} d_{\mathcal{H}}(\mathcal{D}_i, \mathcal{D}_j) \\ &\leq \hat{\mathcal{L}}_{\alpha_i}(h_i^*) + \mu \sqrt{\sum_{j=1}^N \frac{\alpha_{ij}^2}{m_j}} \sqrt{8(d \log(2M) + \log \frac{8}{\delta})} + \sum_{j=1}^N \alpha_{ij} d_{\mathcal{H}}(\mathcal{D}_i, \mathcal{D}_j) \\ &\leq \mathcal{L}_{\mathcal{D}_i}(h_i^*) + 2\mu \sqrt{\sum_{j=1}^N \frac{\alpha_{ij}^2}{m_j}} \sqrt{8(d \log(2M) + \log \frac{8}{\delta})} + 2 \sum_{j=1}^N \alpha_{ij} d_{\mathcal{H}}(\mathcal{D}_i, \mathcal{D}_j). \end{aligned}$$

□

## B Proof of Theorem 2

*Proof.* The learning bound in Theorem 1 suggests minimizing the following objective with respect to  $\alpha_i$  for client  $C_i$ .

$$\begin{aligned} \min_{\alpha_i} \quad &\lambda \sqrt{\sum_{j=1}^N \frac{\alpha_{ij}^2}{m_j}} + \sum_{j=1}^N \alpha_{ij} d_{\mathcal{H}}(\mathcal{D}_i, \mathcal{D}_j) \\ \text{s.t.} \quad &\alpha_{ij} \geq 0, \forall j \in \{1, \dots, N\}, \sum_{j=1}^N \alpha_{ij} = 1. \end{aligned} \quad (9)$$

where  $\lambda = \mu \sqrt{8(d \log(2M) + \log \frac{8}{\delta})}$ . The Lagrangian function of Eq.(9) is

$$\mathbb{L}(\alpha_i, \boldsymbol{\eta}, \zeta) = \lambda \sqrt{\sum_{j=1}^N \frac{\alpha_{ij}^2}{m_j}} + \sum_{j=1}^N \alpha_{ij} d_{\mathcal{H}}(\mathcal{D}_i, \mathcal{D}_j) - \boldsymbol{\alpha}_i^\top \boldsymbol{\eta} - \zeta (\mathbf{1}^\top \boldsymbol{\alpha}_i - 1).$$

To minimize the objective, the following Karush-Kuhn-Tucker (KKT) condition holds:

$$\begin{cases} \partial_{\alpha_i} \mathbb{L}(\alpha_i, \boldsymbol{\eta}, \zeta) = 0. \\ \boldsymbol{\alpha}_i \geq 0, \boldsymbol{\eta} \geq 0, \alpha_{ij} \eta_j = 0, \forall j \in \{1, \dots, N\}. \\ \mathbf{1}^\top \boldsymbol{\alpha}_i = 1. \end{cases}$$

Let the partial derivative equals to zero with respect to  $\forall t \in \{1, \dots, N\}$ :

$$\partial_{\alpha_{it}} \mathbb{L}(\alpha_i, \boldsymbol{\eta}, \zeta) = d_{\mathcal{H}}(\mathcal{D}_i, \mathcal{D}_t) - \eta_t - \zeta - \lambda \frac{\alpha_{it}}{m_t \sqrt{\sum_{j=1}^N \frac{\alpha_{ij}^2}{m_j}}} = 0.$$

Since  $\alpha_{ij} \eta_j = 0, \forall j \in \{1, \dots, N\}$ , we discuss the following two cases:

- (1) If  $\alpha_{it} = 0$ , then  $\eta_t = d_{\mathcal{H}}(\mathcal{D}_i, \mathcal{D}_t) - \zeta \geq 0$ ;
- (2) If  $\alpha_{it} > 0$ , then  $\eta_t = 0$ . In this case,

$$\alpha_{it} = \frac{m_t \sqrt{\sum_{j=1}^N \frac{\alpha_{ij}^2}{m_j}} [\zeta - d_{\mathcal{H}}(\mathcal{D}_i, \mathcal{D}_t)]}{\lambda} > 0.$$

Denote  $\mathcal{Q}_i = \{t \mid \alpha_{it} > 0\}$ . Notice that

$$\zeta - d_{\mathcal{H}}(\mathcal{D}_i, \mathcal{D}_q) \begin{cases} > 0, & q \in \mathcal{Q}_i, \\ \leq 0, & q \notin \mathcal{Q}_i. \end{cases} \quad (10)$$

Thus we sort the clients according to  $d_{\mathcal{H}}(\mathcal{D}_i, \mathcal{D}_j)$ . For convenience, we denote  $\Xi_i^j = d_{\mathcal{H}}(\mathcal{D}_i, \mathcal{D}_j)$  for client  $C_i$  where  $j \in \{1, \dots, N\}$ ,  $\forall i \in \{1, \dots, N\}$ . Sort  $\{\Xi_i^1, \dots, \Xi_i^N\}$  in ascending order to get  $\{\Xi_i^{\sigma(1)}, \dots, \Xi_i^{\sigma(N)}\}$ , i.e.,  $\Xi_i^{\sigma(1)} \leq \dots \leq \Xi_i^{\sigma(N)}$ , where  $\sigma(\cdot) : [N] \rightarrow [N]$  is a bijection which represents the initial index.

Notice that

$$\sum_{q \in \mathcal{Q}_i} \frac{\alpha_{iq}^2}{m_q} = \frac{\sum_{q \in \mathcal{Q}_i} m_q \sum_{j=1}^N \frac{\alpha_{ij}^2}{m_j} [\zeta - d_{\mathcal{H}}(\mathcal{D}_i, \mathcal{D}_q)]^2}{\lambda^2},$$

and for indexes  $q \in \mathcal{Q}_i$ ,

$$\sum_{q \in \mathcal{Q}_i} \frac{\alpha_{iq}^2}{m_q} = \sum_{j=1}^N \frac{\alpha_{ij}^2}{m_j}.$$

Thus we get

$$\sum_{q \in \mathcal{Q}_i} m_q [\zeta - d_{\mathcal{H}}(\mathcal{D}_i, \mathcal{D}_q)]^2 = \lambda^2. \quad (11)$$

The discriminant of Eq.(11) should satisfy the following property:

$$\left( \sum_{q \leq q_i} m_{\sigma(q)} \Xi_i^{\sigma(q)} \right)^2 - \left( \sum_{q \leq q_i} m_{\sigma(q)} \right) \left( \sum_{q \leq q_i} m_{\sigma(q)} (\Xi_i^{\sigma(q)})^2 - \lambda^2 \right) \geq 0, \quad (12)$$

where  $q_i$  is the largest index that makes Eq.(12) hold. Thus  $\zeta$  is the larger solution of Eq.(11). In addition,  $\zeta$  should satisfies Eq.(10). Thus

$$q_i = \arg \max_t \left\{ t \mid \zeta \geq \Xi_i^{\sigma(t)} \wedge \left( \sum_{q \leq t} m_{\sigma(q)} \Xi_i^{\sigma(q)} \right)^2 \geq \left( \sum_{q \leq t} m_{\sigma(q)} \right) \left( \sum_{q \leq t} m_{\sigma(q)} (\Xi_i^{\sigma(q)})^2 - \lambda^2 \right) \right\}.$$

Notice that  $\mathbf{1}^\top \boldsymbol{\alpha}_i = 1$ , thus we have

$$\sum_{q \in \mathcal{Q}_i} \alpha_q = \frac{\sum_{q \in \mathcal{Q}_i} m_q \sqrt{\sum_{j=1}^N \frac{\alpha_{ij}^2}{m_j} [\zeta - d_{\mathcal{H}}(\mathcal{D}_i, \mathcal{D}_q)]}}{\lambda} = 1.$$

Thus we obtain

$$\sqrt{\sum_{j=1}^N \frac{\alpha_{ij}^2}{m_j}} = \frac{\lambda}{\sum_{q \in \mathcal{Q}_i} m_q [\zeta - d_{\mathcal{H}}(\mathcal{D}_i, \mathcal{D}_q)]}.$$

Thus we get the required result

$$\alpha_{ij}^* = \left[ \frac{m_j (\zeta - \Xi_i^j)}{\sum_{q \leq q_i} m_{\sigma(q)} (\zeta - \Xi_i^{\sigma(q)})} \right]_+,$$

where  $[\cdot]_+ = \max(\cdot, 0)$ .

□

## C Proof of Theorem 3 and Lemma 2

First we prove that maximizing Eq.(6) is equivalent to maximizing Eq.(7).

**Lemma 4.** Maximizing the objective  $\sum_{i,j} \left( \frac{w_{ij}}{2W} - \frac{d_i d_j}{4W^2} \right) \boldsymbol{\nu}_i \cdot \boldsymbol{\nu}_j$  is equivalent to maximizing objective

$$\sum_{\mathcal{M}^+} \mathcal{M}_{ij} \boldsymbol{\nu}_i \cdot \boldsymbol{\nu}_j + \sum_{\mathcal{M}^-} -\mathcal{M}_{ij} (1 - \boldsymbol{\nu}_i \cdot \boldsymbol{\nu}_j) \text{ where } \mathcal{M} = \frac{w_{ij}}{2W} - \frac{d_i d_j}{4W^2}.$$

*Proof.* Note that  $\sum_{i,j} \mathcal{M}_{ij} = 0$ , thus  $P = \sum_{\mathcal{M}^+} \mathcal{M}_{ij} = \sum_{\mathcal{M}^-} -\mathcal{M}_{ij}$  is a constant. Add constant  $P$  to the original objective, then the new objective is

$$\begin{aligned} \sum_{i,j} \left( \frac{w_{ij}}{2W} - \frac{d_i d_j}{4W^2} \right) \nu_i \cdot \nu_j + P &= \sum_{i,j} \mathcal{M}_{ij} \nu_i \cdot \nu_j + \sum_{\mathcal{M}^-} -\mathcal{M}_{ij} \\ &= \sum_{\mathcal{M}^+} \mathcal{M}_{ij} \nu_i \cdot \nu_j + \sum_{\mathcal{M}^-} -\mathcal{M}_{ij} (1 - \nu_i \cdot \nu_j). \end{aligned}$$

Thus maximizing these two objective is equivalent.  $\square$

Then we prove Lemma 2.

*Proof.* Suppose  $\mathcal{G} = \{G_1, \dots, G_K\}$  is the group partition returned by Algorithm 1. Let  $Q(\mathcal{G})$  be the modularity of  $\mathcal{G}$ . We have  $Q(\mathcal{G}) > \kappa \text{OPT}_{Q(\mathcal{G})} - (1 - \kappa)$  according to Lemma 1. Recall that modularity is defined as  $Q(\mathcal{G}) = \frac{1}{W} \sum_k W_{in}^{G_k} - \frac{1}{4W^2} \sum_k (W_{vol}^{G_k})^2$ . Note that  $\sum_k W_{vol}^{G_k} = 2W$ . By Cauchy inequality,

$$\frac{1}{4W^2} \sum_k (W_{vol}^{G_k})^2 \geq \frac{1}{4W^2} \frac{1}{K} \left( \sum_k W_{vol}^{G_k} \right)^2 = \frac{1}{K}.$$

Thus we get

$$\sum_k W_{in}^{G_k} \geq W \left( Q(\mathcal{G}) + \frac{1}{K} \right) \geq W \left( \kappa \text{OPT}_{Q(\mathcal{G})} - (1 - \kappa) + \frac{1}{K} \right).$$

Since  $\mathbf{U}$  is defined as  $\mathbf{U} = \mathbf{D}_{in}^{-\frac{1}{2}} \mathbf{A} \mathbf{A}^T \mathbf{D}_{in}^{-\frac{1}{2}}$ , the weight of *strong edge* in  $\mathbf{U}$  satisfies  $w_{ij} \leq 1$ . According to the definition of *weak edge*, the weight of *weak edge* satisfies  $w_{ij} \leq \frac{1}{N}$ . Let  $\mathcal{E}_{in}$  be the set of all intra-group edges. The total number of intra-group edges  $|\mathcal{E}_{in}| = \sum_{k=1}^K \frac{N_k(N_k-1)}{2} = \frac{1}{2} \left( \sum_{k=1}^K N_k^2 - N \right)$ . We have that

$$\begin{aligned} \sum_k W_{in}^{G_k} &= \sum_{e_{ij} \in Z_{in}} w_{ij} + \sum_{e_{ij} \in \mathcal{E}_{in} \setminus Z_{in}} w_{ij} \\ &\leq \sum_{e_{ij} \in Z_{in}} \frac{1}{N} + \sum_{e_{ij} \in \mathcal{E}_{in} \setminus Z_{in}} (|\mathcal{E}_{in}| - |Z_{in}|). \end{aligned}$$

Thus we obtain

$$\begin{aligned} Z_{in} &\leq \frac{N}{N-1} \left( |\mathcal{E}_{in}| - \sum_k W_{in}^{G_k} \right) \\ &\leq \frac{N}{2(N-1)} \left[ \sum_{k=1}^K N_k^2 - N - 2W \left( \kappa \text{OPT}_{Q(\mathcal{G})} - (1 - \kappa) + \frac{1}{K} \right) \right] \\ &\leq \frac{N}{2(N-1)} \left[ \frac{N^2}{K} - N - 2W \left( \kappa \text{OPT}_{Q(\mathcal{G})} + \kappa - 1 + \frac{1}{K} \right) \right] \\ &= \frac{N}{2(N-1)} \left[ \frac{N^2 - KN}{K} - 2W \left( (\kappa + 1) \text{OPT}_{Q(\mathcal{G})} - \frac{K-1}{K} \right) \right]. \end{aligned}$$

Assume there are  $x_k$  *bad client* in group  $G_k$ , which will yield  $x_k(N_k - x_k)$  *weak edge* in group  $G_k$ . Thus we have

$$Z_{in} \geq \sum_{k=1}^K x_k(N_k - x_k) \geq x_1(N_{min} - x_1).$$

Since  $N_{min} \geq \sqrt{2Z_{in}}$ , we have  $x_1 \leq \frac{N_{min} - \sqrt{N_{min}^2 - 4Z_{in}}}{2} \leq \frac{N_1}{2}$ . Since  $N_{min} = \min_k N_k$ , one bad client in other groups will yield more weak edge than in  $G_{min}$  corresponding to  $N_{min}$ . Thus  $|\mathcal{B}| \leq \frac{N_{min} - \sqrt{N_{min}^2 - 4Z_{in}}}{2}$ . □

To prove Theorem 3, we first provide the following supporting lemma.

**Lemma 5.** Suppose two vectors  $\alpha, \beta \in \mathbb{R}^N$  which satisfy  $\sum_{i=1}^N \alpha_i \beta_i \geq \tau$  where  $\tau \geq \frac{1}{N}$  is a constant, then

$$\sum_{i=1}^N (\alpha_i - \beta_i)^2 \leq (1 - \tau)^2 \frac{N}{N-1}.$$

*Proof.* We seek to maximize the distance between  $\alpha$  and  $\beta$ , which can be formalized as follows.

$$\begin{aligned} \min_{\alpha, \beta} \quad & -\|\alpha - \beta\|_2^2 \\ \text{s.t.} \quad & \sum_{i=1}^N \alpha_i = 1, \quad \sum_{i=1}^N \beta_i = 1, \\ & \sum_{i=1}^N \alpha_i \beta_i \geq \tau. \end{aligned} \tag{13}$$

The Lagrangian function of Eq. (13) is

$$\mathbb{L}(\alpha, \beta, \lambda_1, \lambda_2, \lambda_3) = -\sum_{i=1}^N (\alpha_i - \beta_i)^2 - \lambda_1 \left( \sum_{i=1}^N \alpha_i - 1 \right) - \lambda_2 \left( \sum_{i=1}^N \beta_i - 1 \right) - \lambda_3 \left( \sum_{i=1}^N \alpha_i \beta_i - \tau \right).$$

The following Karush-Kuhn-Tucker (KKT) condition holds.

$$\begin{cases} \partial_{\alpha} \mathbb{L}(\alpha, \beta, \lambda_1, \lambda_2, \lambda_3) = 0, & \partial_{\beta} \mathbb{L}(\alpha, \beta, \lambda_1, \lambda_2, \lambda_3) = 0, \\ \sum_{i=1}^N \alpha_i \beta_i \geq \tau, \quad \lambda_3 \geq 0, \quad \lambda_3 (\sum_{i=1}^N \alpha_i \beta_i - \tau) = 0, \\ \sum_{i=1}^N \alpha_i = 1, \quad \sum_{i=1}^N \beta_i = 1. \end{cases}$$

Let the partial derivative equals to zero with respect to  $\alpha_i, \forall i \in \{1, \dots, N\}$ .

$$\partial_{\alpha_i} \mathbb{L}(\alpha, \beta, \lambda_1, \lambda_2, \lambda_3) = -2(\alpha_i - \beta_i) - \lambda_1 - \lambda_3 \beta_i = 0.$$

Thus we get

$$\alpha_i = \frac{(2 - \lambda_3)\beta_i - \lambda_1}{2}.$$

Note that  $\sum_{i=1}^N \alpha_i = 1$  and  $\sum_{i=1}^N \beta_i = 1$ .

$$\sum_{i=1}^N \alpha_i = \sum_{i=1}^N \frac{(2 - \lambda_3)\beta_i - \lambda_1}{2} = 1 - \frac{\lambda_3}{2} - \frac{\lambda_1}{2} N = 1.$$

Thus  $\lambda_3 = -N\lambda_1$ . Analogously,  $\lambda_3 = -N\lambda_2$ . Set  $\lambda_1 = \lambda_2 = -\lambda \neq 0$  and thus  $\lambda_3 = N\lambda \neq 0$ . Substituting  $\lambda_1$  with  $-\lambda$  and  $\lambda_3$  with  $N\lambda$ , we have

$$\alpha_i = \frac{(2 - N\lambda)\beta_i + \lambda}{2}.$$

Since  $\lambda_3 (\sum_{i=1}^N \alpha_i \beta_i - \tau) = 0$ , we have  $\sum_{i=1}^N \alpha_i \beta_i = \tau$ .

$$\sum_{i=1}^N \alpha_i \beta_i = \sum_{i=1}^N \frac{(2 - N\lambda)\beta_i^2 + \lambda\beta_i}{2} = \frac{\lambda}{2} + \frac{2 - N\lambda}{2} \sum_{i=1}^N \beta_i^2 = \tau.$$

Denote  $\sum_{i=1}^N \beta_i^2 = x$ , then

$$\lambda = \frac{2x - 2\tau}{Nx - 1} > 0.$$

Thus  $x > \tau \geq \frac{1}{N}$ . Since  $1 \geq \sum_{i=1}^N \beta_i^2 \geq \frac{1}{N} \left( \sum_{i=1}^N \beta_i \right)^2 = \frac{1}{N}$ , thus  $x \in [\tau, 1]$ .

The distance is then

$$\sum_{i=1}^N (\alpha_i - \beta_i)^2 = \sum_{i=1}^N \left( \frac{\lambda - N\lambda\beta_i}{2} \right)^2 = \frac{N(x - \tau)^2}{(Nx - 1)}.$$

Let  $f(x) = \frac{(x - \tau)^2}{(Nx - 1)}$  with its derivative

$$f'(x) = \frac{Nx^2 - 2x + 2\tau - N\tau^2}{(Nx - 1)^2}.$$

Obviouly,  $f'(x) \geq 0$  when  $x \in [\tau, 1]$ . Thus  $f(x)$  is monotonically increasing for  $x \in [\tau, 1]$ . Thus we get the required result

$$\sum_{i=1}^N (\alpha_i - \beta_i)^2 \leq Nf(1) = (1 - \tau)^2 \frac{N}{N - 1}.$$

□

We use the above lemma to prove Theorem 3

*Proof.* Since  $\mathbf{U}$  is defined as  $\mathbf{U}_{in} = \mathbf{D}_{in}^{-\frac{1}{2}} \mathbf{A} \mathbf{A}^T \mathbf{D}_{in}^{-\frac{1}{2}}$ , its elements are expressed as  $U_{ij} = \frac{1}{\sqrt{d_i^{in} d_j^{in}}} \sum_{t=1}^N A_{it} A_{jt}$ . Note that  $d_i^{in} = \sum_{j=1}^N \alpha_{ij}^* = 1$  and  $A_{it} = \alpha_{it}^*$ . Thus  $U_{ij} = \sum_{t=1}^N \alpha_{it}^* \alpha_{jt}^*$ . Considering two good clients  $C_i$  and  $C_j$ . If  $e_{ij}$  is a strong edge, i.e.,  $w_{ij} \geq \frac{1}{N}$ , then  $\|\alpha_i^* - \alpha_j^*\|_2 \leq (1 - \tau) \sqrt{\frac{N}{N-1}}$  according to Lemma 5. Otherwise,  $C_i$  can reach  $C_j$  through a path whose length is less than  $\eta$ . According to the triangle inequality,  $\|\alpha_i^* - \alpha_j^*\|_2 \leq \eta(1 - \tau) \sqrt{\frac{N}{N-1}}$ .

Note that  $f(x) = x^2$  is a convex function on  $[0, \infty)$ . According to Jensen inequality,  $f\left(\frac{1}{N} \sum_{i=1}^N |x_i|\right) \leq \frac{1}{N} \sum_{i=1}^N f(|x_i|)$ . Thus

$$\left( \frac{1}{N} \sum_{i=1}^N |x_i| \right)^2 \leq \frac{1}{N} \sum_{i=1}^N |x_i|^2 \Rightarrow \|\mathbf{x}\|_1 = \sum_{i=1}^N |x_i| \leq \sqrt{N \sum_{i=1}^N |x_i|^2} = \sqrt{N} \|\mathbf{x}\|_2.$$

Thus we get the required result

$$\begin{aligned} \text{upp}(\hat{h}_{G_k}) - \text{upp}(\hat{h}_{\alpha_i^*}) &= 2 \sum_{j=1}^N (\alpha_{G_k j} - \alpha_{ij}^*) d_{\mathcal{H}}(\mathcal{D}_i, \mathcal{D}_j) + 2\lambda \left( \sqrt{\sum_{j=1}^N \frac{\alpha_{G_k j}^2}{m_j}} - \sqrt{\sum_{j=1}^N \frac{\alpha_{ij}^{*2}}{m_j}} \right) \\ &\leq 2 \left| \sum_{j=1}^N (\alpha_{G_k j} - \alpha_{ij}^*) \right| + 2\lambda \sqrt{\sum_{j=1}^N \frac{(\alpha_{G_k j} - \alpha_{ij}^*)^2}{m_j}} \\ &\leq 2 \|\alpha_{G_k} - \alpha_i^*\|_1 + 2\lambda \|\alpha_{G_k} - \alpha_i^*\|_2 \\ &\leq O\left(\eta(1 - \tau) \sqrt{\frac{N}{N-1}}\right). \end{aligned}$$

□

## D Proof of Theorem 4 and Lemma 3

First we prove Lemma 3

*Proof.* When  $\{\alpha_1^*, \dots, \alpha_N^*\}$  satisfy the  $(1 + \gamma, \epsilon)$ -approximation-stability property, let  $\mathcal{P}^* = \{P_1^*, \dots, P_K^*\}$  be the optimal group partition with the minimum  $\Phi(\mathcal{P})$ . The average distance in  $\mathcal{P}^*$  is defined as  $\bar{d} = \frac{1}{N} \text{OPT}_{\Phi(\mathcal{P})}$ . For any constant  $t > 2$ , lemma 3 in Balcan et al. (2009) reveals that there are less than  $6\epsilon N$  clients with  $d_2(\alpha_i^*) - d_1(\alpha_i^*) \leq \frac{\gamma \bar{d}}{2\epsilon}$  and less than  $\frac{t\epsilon N}{\gamma}$  clients with  $d_1(\alpha_i^*) \geq \frac{\gamma \bar{d}}{t\epsilon}$  in  $\mathcal{P}^*$ . Recall that the critical distance in  $\mathcal{P}^*$  is defined as  $d^* = \frac{\gamma \bar{d}}{t\epsilon}$ . In Algorithm 2 we run a constant-factor  $K$ -median approximation algorithm on  $\{\alpha_1^*, \dots, \alpha_N^*\}$  to compute an estimate  $\hat{d} \in [\bar{d}, \beta \bar{d}]$  where  $\beta > 1$  is a given constant. Let  $\mathcal{P} = \{P_1, \dots, P_K\}$  be the group partition returned by the DIVIDE part in Algorithm 2. Note that the critical distance in  $\mathcal{P}$  is defined as  $\hat{d}^* = \frac{\gamma \hat{d}}{\beta t \epsilon} \leq \frac{\gamma \bar{d}}{t\epsilon} = d^*$ . We have that the set  $\mathcal{B} = \{\alpha_i^* \in S \mid d_1(\alpha_i^*) \geq \hat{d}^* \vee d_2(\alpha_i^*) - d_1(\alpha_i^*) \leq \frac{t}{2} \hat{d}^*\}$  of bad clients in  $\hat{\mathcal{P}}$  has size  $|\mathcal{B}| < (6 + \frac{t}{\gamma})\beta\epsilon N$ .  $\square$

Then we prove Theorem 4.

*Proof.* For good client  $C_i$  in group  $P_k$ ,  $d_1(\alpha_i^*) \leq \hat{d}^* = \frac{\gamma \hat{d}}{\beta t \epsilon} \leq \frac{\gamma \bar{d}}{t\epsilon}$ . According to the equivalence of norms in the normed vector spaces, we assume  $d(\cdot, \cdot) = \|\cdot\|_1$ . Notice the following inequality:

$$\|\mathbf{x}\|_2 = \left( \sum_{i=1}^N |x_i|^2 \right)^{\frac{1}{2}} \leq \sum_{i=1}^N (|x_i|^2)^{\frac{1}{2}} = \sum_{i=1}^N |x_i| = \|\mathbf{x}\|_1$$

Let  $\alpha_{P_k}$  be the average collaboration vector that Algorithm 2 uses to train model  $h_{\alpha_{P_k}}$  for group  $P_k$ . Then we get the required result

$$\begin{aligned} \text{upp}(\hat{h}_{P_k}) - \text{upp}(\hat{h}_{\alpha_i^*}) &= 2 \sum_{j=1}^N (\alpha_{P_{kj}} - \alpha_{ij}^*) d_{\mathcal{H}}(\mathcal{D}_i, \mathcal{D}_j) + 2\lambda \left( \sqrt{\sum_{j=1}^N \frac{\alpha_{P_{kj}}^2}{m_j}} - \sqrt{\sum_{j=1}^N \frac{\alpha_{ij}^{*2}}{m_j}} \right) \\ &\leq 2 \left| \sum_{j=1}^N (\alpha_{P_{kj}} - \alpha_{ij}^*) \right| + 2\lambda \sqrt{\sum_{j=1}^N \frac{(\alpha_{P_{kj}} - \alpha_{ij}^*)^2}{m_j}} \\ &\leq 2\|\alpha_{P_k} - \alpha_i^*\|_1 + 2\lambda\|\alpha_{P_k} - \alpha_i^*\|_2 \\ &\leq (2 + 2\lambda)\|\alpha_{P_k} - \alpha_i^*\|_1 \\ &\leq O\left(\frac{\gamma \text{OPT}_{\Phi(\mathcal{P})}}{\epsilon t N}\right). \end{aligned}$$

$\square$

## E Proof of the relationships between two divergences

We begin by proving some useful lemmas.

Let  $(\mathcal{X}, \mathcal{A})$  be a measurable space. Let  $P$  and  $Q$  be two probability measures on  $(\mathcal{X}, \mathcal{A})$ . Suppose that  $\nu$  is a  $\sigma$ -finite measure on  $(\mathcal{X}, \mathcal{A})$  satisfying  $P \ll \nu$  and  $Q \ll \nu$ . Define  $p = dP/d\nu$ , and  $q = dQ/d\nu$ . The total variation distance between  $P$  and  $Q$  is defined as follows:

$$V(P, Q) = \sup_{A \in \mathcal{A}} |P(A) - Q(A)| = \sup_{A \in \mathcal{A}} \left| \int_A (p - q) d\nu \right|.$$

It is easy to prove that  $V(P, Q)$  satisfies the axioms of distance and  $0 \leq V(P, Q) \leq 1$ . In this section, we will often write for brevity  $\int(\dots)$  instead of  $\int(\dots)d\nu$  for simplicity.

**Lemma 6.**

$$V(P, Q) = \frac{1}{2} \int |p - q| d\nu = 1 - \int \min(p, q) d\nu.$$

*Proof.* Denote  $A_0 = \{x \in \mathcal{X} : q(x) \geq p(x)\}$ . Then we get  $\int |p - q|d\nu = 2 \int_{A_0} (q - p)d\nu$  and

$$V(P, Q) \geq Q(A_0) - P(A_0) = \frac{1}{2} \int |p - q|d\nu = 1 - \int \min(p, q)d\nu.$$

On the other hand, for all  $A \in \mathcal{A}$  we have

$$\begin{aligned} \left| \int_A (q - p)d\nu \right| &= \left| \int_{A \cap A_0} (q - p)d\nu + \int_{A \cap A_0^c} (q - p)d\nu \right| \\ &\leq \max \left\{ \int_{A_0} (q - p)d\nu, \int_{A_0^c} (p - q)d\nu \right\} = \frac{1}{2} \int |p - q|d\nu \end{aligned}$$

where  $A_0^c$  is the complement of  $A_0$ . Then  $V(P, Q) = Q(A_0) - P(A_0)$  implies the required result.  $\square$

**Lemma 7.**

$$\int \min(p, q)d\nu \geq \frac{1}{2} \left( \int \sqrt{dPdQ} \right)^2.$$

*Proof.* By noticing that  $\int \max(p, q) + \int \min(p, q) = 2$ , we obtain

$$\begin{aligned} \left( \int \sqrt{pq} \right)^2 &= \left( \int \sqrt{\min(p, q) \max(p, q)} \right)^2 \leq \int \min(p, q) \int \max(p, q) \\ &= \int \min(p, q) \left[ 2 - \int \min(p, q) \right] \leq 2 \int \min(p, q) \end{aligned}$$

which proves the required inequality.  $\square$

**Lemma 8.**

$$\int \min(p, q)d\nu \geq \frac{1}{2} \exp(-d_{\text{KL}}(P\|Q)).$$

where  $d_{\text{KL}}(P\|Q)$  is the Kullback–Leibler (KL) divergence.

*Proof.* It is sufficient to assume that  $d_{\text{KL}}(P\|Q) < +\infty$ . Using the Jensen inequality we get

$$\begin{aligned} \left( \int \sqrt{pq} \right)^2 &= \exp \left( 2 \log \int_{pq>0} \sqrt{pq} \right) = \exp \left( 2 \log \int_{pq>0} p \sqrt{\frac{q}{p}} \right) \\ &\geq \exp \left( 2 \int_{pq>0} p \log \sqrt{\frac{q}{p}} \right) = \exp(d_{\text{KL}}(P\|Q)). \end{aligned}$$

By comparing this result with that in Lemma 7, we yield the required result.  $\square$

Now we prove the result in our paper.

*Proof.* When the hypothesis space  $\mathcal{H}$  is the class of functions taking values in  $[-1, 1]$ , the Integral Probability Metrics (IPM)  $d_{\mathcal{H}}(\mathcal{D}_i, \mathcal{D}_j) = \sup_{h \in \mathcal{H}} |\mathcal{L}_{\mathcal{D}_i}(h) - \mathcal{L}_{\mathcal{D}_j}(h)|$  can also be viewed as the total variation distance. According to Pinsker's inequality we have

$$d_{\mathcal{H}}(\mathcal{D}_i, \mathcal{D}_j) \leq \sqrt{\frac{d_{\text{KL}}(\mathcal{D}_i\|\mathcal{D}_j)}{2}},$$

where  $d_{\text{KL}}(\mathcal{D}_i, \mathcal{D}_j)$  is the Kullback–Leibler (KL) divergence. We can get the following result by noticing that  $d_{\text{JS}}(\mathcal{D}_i\|\mathcal{D}_j) = \frac{1}{2}d_{\text{KL}}(\mathcal{D}_i\|\mathcal{D}_j) + \frac{1}{2}d_{\text{KL}}(\mathcal{D}_j\|\mathcal{D}_i)$  where  $d_{\text{JS}}(\mathcal{D}_i\|\mathcal{D}_j)$  is the Jensen–Shannon (JS) divergence

$$2d_{\mathcal{H}}(\mathcal{D}_i, \mathcal{D}_j)^2 \leq \frac{d_{\text{KL}}(\mathcal{D}_i\|\mathcal{D}_j)}{2} + \frac{d_{\text{KL}}(\mathcal{D}_j\|\mathcal{D}_i)}{2} \iff d_{\mathcal{H}}(\mathcal{D}_i, \mathcal{D}_j) \leq \sqrt{\frac{d_{\text{JS}}(\mathcal{D}_i\|\mathcal{D}_j)}{2}}.$$



By combining Lemma 6 and Lemma 8 we can easily obtain that

$$d_{\mathcal{H}}(\mathcal{D}_i, \mathcal{D}_j) \leq 1 - \frac{1}{2} \exp(-d_{\text{KL}}(\mathcal{D}_i \parallel \mathcal{D}_j)).$$

Notice that

$$\begin{aligned} -\log(2 - 2d_{\mathcal{H}}(\mathcal{D}_i, \mathcal{D}_j)) &\leq \frac{d_{\text{KL}}(\mathcal{D}_i \parallel \mathcal{D}_j)}{2} + \frac{d_{\text{KL}}(\mathcal{D}_j \parallel \mathcal{D}_i)}{2} \\ \iff d_{\mathcal{H}}(\mathcal{D}_i, \mathcal{D}_j) &\leq 1 - \frac{1}{2} \exp(-d_{\text{JS}}(\mathcal{D}_i \parallel \mathcal{D}_j)). \end{aligned}$$

Thus we get the required result

$$d_{\mathcal{H}}(\mathcal{D}_i, \mathcal{D}_j) \leq \min \left\{ 1 - \frac{1}{2} e^{-d_{\text{JS}}(\mathcal{D}_i \parallel \mathcal{D}_j)}, \sqrt{\frac{d_{\text{JS}}(\mathcal{D}_i \parallel \mathcal{D}_j)}{2}} \right\}.$$

□
